# Supplementary figures and images for: Anatomical Connectivity of the Visuospatial Attentional Network in Schizophrenia: A Diffusion Tensor Imaging Tractography Study
Source: Atypon-hosted journal article supplement (doi:10.1176/appi.neuropsych.19040101), 2020-01-17

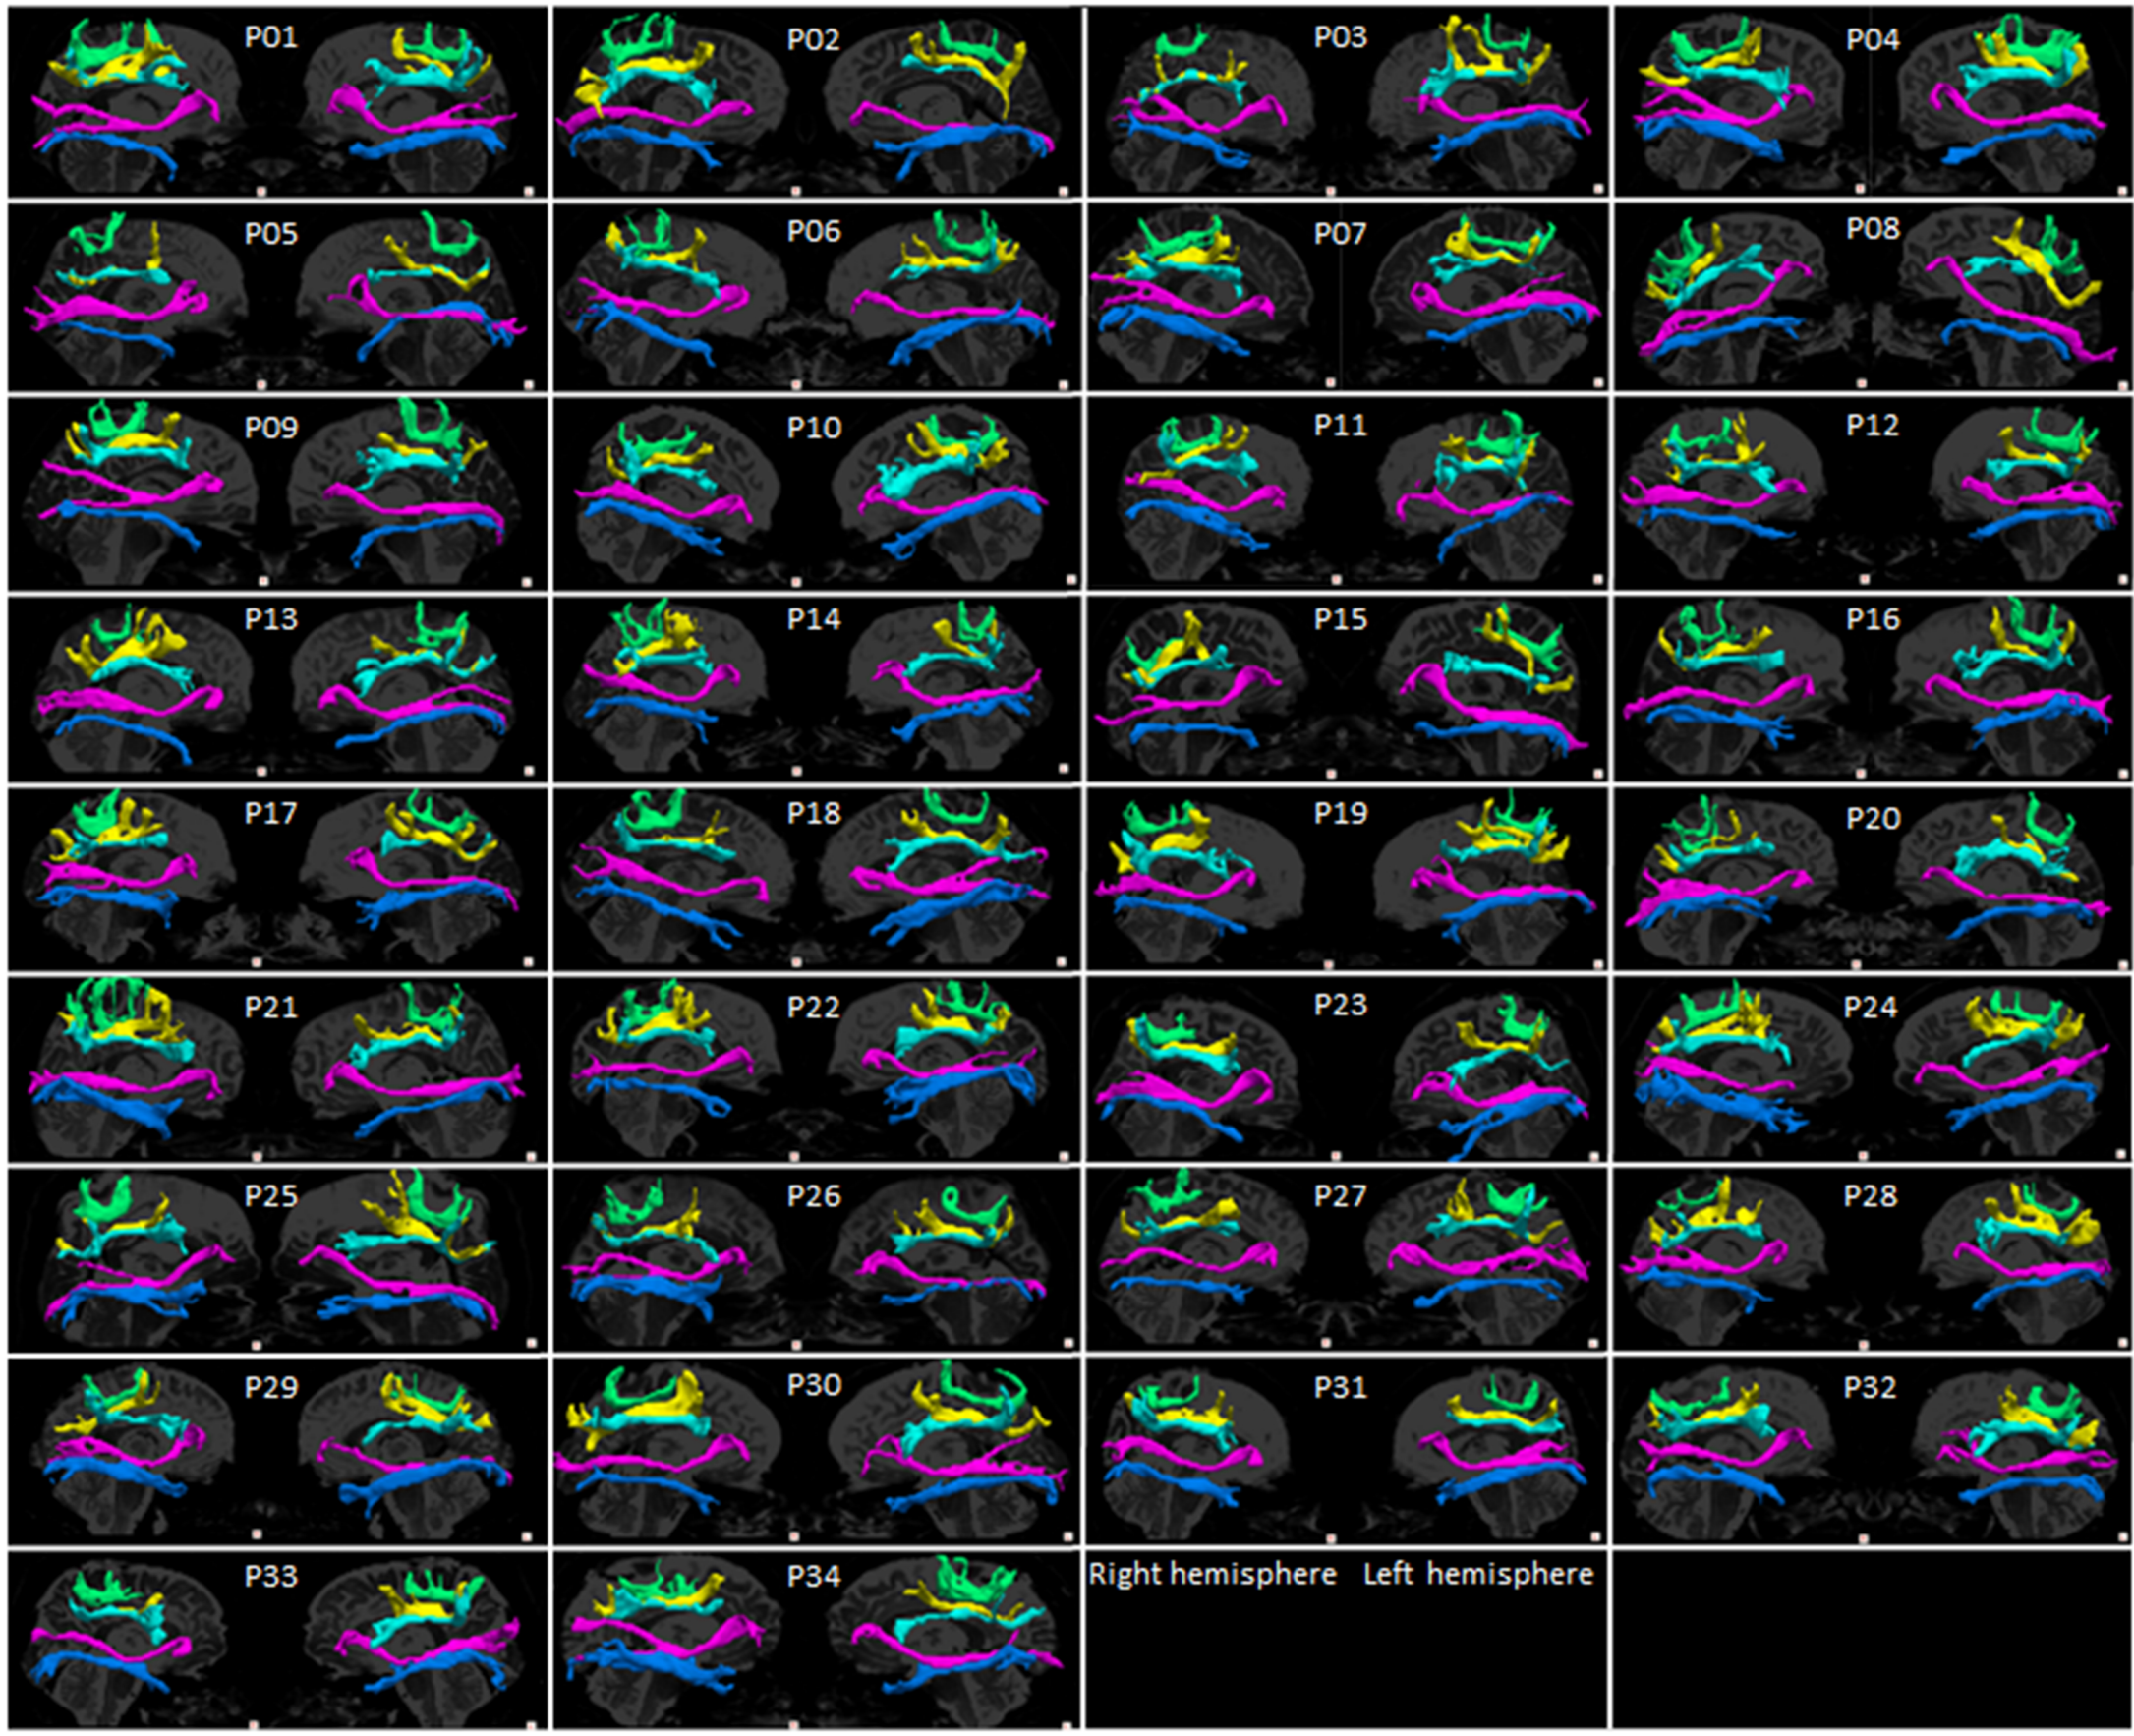

Supplement: appi.neuropsych.19040101.ds001.pdf [file appi.neuropsych.19040101.ds001.pdf]
